# Supplementary material for: Long-Term Zinc Fertilization in Calcareous Soils Improves Wheat (Triticum aestivum L.) Productivity and Soil Zinc Status in the Rice–Wheat Cropping System
Source: MDPI journal article supplement (doi:10.3390/agronomy11071306), 2021-06-27
Supplement: s1 [file s1]

**Table S1:** Zn content (mg kg<sup>-1</sup>) in wheat grain and stover

| Treatments                                                             | Grain Zn<br>content (mg kg <sup>-1</sup> ) | Straw Zn content<br>(mg kg <sup>-1</sup> ) |
|------------------------------------------------------------------------|--------------------------------------------|--------------------------------------------|
| T <sub>1</sub> : Zn at 2.5 kg ha <sup>-1</sup> in 1 <sup>st</sup> year | 24.7                                       | 24.7                                       |
| T <sub>2</sub> : Zn at 5.0 kg ha <sup>-1</sup> in 1 <sup>st</sup> year | 24.6                                       | 24.7                                       |
| T <sub>3</sub> : Zn at 7.5 kg ha <sup>-1</sup> in 1 <sup>st</sup> year | 24.7                                       | 24.7                                       |
| T <sub>4</sub> : Zn at 10 kg ha <sup>-1</sup> in 1 <sup>st</sup> year  | 24.7                                       | 24.6                                       |
| T <sub>5</sub> : Zn at 2.5 kg ha <sup>-1</sup> in alternate year       | 24.7                                       | 24.7                                       |
| T <sub>6</sub> : Zn at 5.0 kg ha <sup>-1</sup> in alternate year       | 24.6                                       | 24.4                                       |
| T <sub>7</sub> : Zn at 7.5 kg ha <sup>-1</sup> in alternate year       | 24.6                                       | 24.7                                       |
| T <sub>8</sub> : Zn at 10 kg ha <sup>-1</sup> in alternate year        | 24.7                                       | 24.7                                       |
| T <sub>9</sub> : Zn at 2.5 kg ha <sup>-1</sup> in every year           | 24.7                                       | 24.7                                       |
| T <sub>10</sub> : Zn at 5.0 kg ha <sup>-1</sup> in every year          | 24.7                                       | 24.7                                       |
| T <sub>11</sub> : Zn at 7.5 kg ha <sup>-1</sup> in every year          | 24.7                                       | 24.7                                       |
| T <sub>12</sub> : Zn at 10 kg ha <sup>-1</sup> in every year           | 24.7                                       | 24.7                                       |
| T <sub>13</sub> : Control (No Zn application)                          | 24.6                                       | 24.5                                       |
| SEm (±)                                                                | 1.1                                        | 1.1                                        |
| LSD ( <i>P</i> ≤0.05)                                                  | ns                                         | ns                                         |
